# Supplementary material for: Childhood trauma, PTSD/CPTSD and chronic pain: A systematic review
Source: PLoS One. 2024 Aug 30;19(8):e0309332. doi: 10.1371/journal.pone.0309332 (PMC11364226; doi:10.1371/journal.pone.0309332)
Supplement: S2 File — (XLSX) [file pone.0309332.s002.xlsx]

## Sheet: Title + Abstract
Library	AUTHOR	TITLE	YEAR	Inclusion (0) / exclusion (1)	Reason for exclusion
WoScience	Aaron, R; Noel, M; Dudeney, J; Wilson, A; Holley, A; Palermo, T	The role of sleep quality on the relationship between posttraumatic stress symptoms and pain in women	2019	1	5
WoScience	Afari, N; Ahumada, SM; Wright, LJ; Mostoufi, S; Golnari, G; Reis, V; Cuneo, JG	Psychological Trauma and Functional Somatic Syndromes: A Systematic Review and Meta-Analysis	2014	1	6
PsycInfo	Alciati, Alessandra; Cirillo, Mariateresa; Masala, Ignazio Francesco; Sarzi‐Puttini, Piercarlo; Atzeni, Fabiola	Differences in depression, anxiety and stress disorders between fibromyalgia associated with rheumatoid arthritis and primary fibromyalgia	2021	0
WoScience	Arnow, BA; Hart, S; Hayward, C; Dea, R; Taylor, CB	Severity of child maltreatment, pain complaints and medical utilization among women	2000	1	4
WoScience	Asgeirsdottir, HG; Valdimarsdottir, U; Furst, CJ; Steineck, G; Hauksdottir, A	Low preparedness before the loss of a wife to cancer and the widower's chronic pain 4-5 years later-a population-based study	2013	1	4
WoScience	Ataoglu, S; Ankarali, H; Ataoglu, A; Ankarali, S; Ataoglu, BB; Olmez, SB	The Effect of Traumatic Experiences on Disease in Patients with Fibromyalgia Syndrome	2018	1	7
WoScience	Atwoli, L; Platt, JM; Basu, A; Williams, DR; Stein, DJ; Koenen, KC	Associations between lifetime potentially traumatic events and chronic physical conditions in the South African Stress and Health Survey: a cross-sectional study	2016	1	3
WoScience	Austin, AE; Shanahan, ME; Zvara, BJ	Association of childhood abuse and prescription opioid use in early adulthood	2018	1	4
PsycInfo	Beal, Sarah J.; Kashikar-Zuck, Susmita; King, Christopher; Black, William; Barnes, Jaclyn; Noll, Jennie G.	Heightened risk of pain in young adult women with a history of childhood maltreatment: A prospective longitudinal study	2020	1	1
Pubmed	Bell, I. R.; Baldwin, C. M.; Russek, L. G.; Schwartz, G. E.; Hardin, E. E.	Early life stress, negative paternal relationships, and chemical intolerance in middle-aged women: support for a neural sensitization model	1998	1	1
Pubmed	Bell, R. F.; Schjødt, B.; Paulsberg, A. G.	[Childhood trauma and chronic pain]	2000	1	7
PsycInfo	Beveridge, Jaimie K.; Yeates, Keith O.; Madigan, Sheri; Stone, Amanda L.; Wilson, Anna C.; Sumpton, Janice E.; Salberg, Sabrina; Mychasiuk, Richelle; Noel, Melanie	Examining parent adverse childhood experiences as a distal risk factor in pediatric chronic pain	2022	1	1
WoScience	Bohn, D; Bernardy, K; Wolfe, F; Hauser, W	The Association Among Childhood Maltreatment, Somatic Symptom Intensity, Depression, and Somatoform Dissociative Symptoms in Patients with Fibromyalgia Syndrome: A Single-Center Cohort Study	2013	1	4
WoScience	Booth, BM; Davis, TD; Cheney, AM; Mengeling, MA; Torner, JC; Sadler, AG	Physical Health Status of Female Veterans: Contributions of Sex Partnership and In-Military Rape	2012	1	3
WoScience	Boscarino, JA; Adams, RE; Wingate, TJ; Boscarino, JJJ; Urosevich, TG; Hoffman, SN; Kirchner, HL; Figley, CR; Nash, WP	Impact and Risk of Moral Injury Among Deployed Veterans: Implications for Veterans and Mental Health	2022	1	5
WoScience	Bourke, JH; Langford, RM; White, PD	The common link between functional somatic syndromes may be central sensitisation	2015	1	6
WoScience	Brown, RC; Plener, PL; Braehler, E; Fegert, JM; Huber-Langs, M	Associations of adverse childhood experiences and bullying on physical pain in the general population of Germany	2018	1	4
PsycInfo	Carretier, Emilie; Lachal, Jonathan; Franzoni, Nina; Guessoum, Selim Benjamin; Moro, Marie Rose	Disclosure of sibling sexual abuse by hospitalized adolescent girls: Three case reports	2022	1	1
WoScience	Chandler, HK; Ciccone, DS; Raphael, KG	Localization of pain and self-reported rape in a female community sample	2006	1	4
Pubmed	Christensen, Jennaya; Beveridge, Jaimie K.; Wang, Melinda; Orr, Serena L.; Noel, Melanie; Mychasiuk, Richelle	A Pilot Study Investigating the Role of Gender in the Intergenerational Relationships between Gene Expression, Chronic Pain, and Adverse Childhood Experiences in a Clinical Sample of Youth with Chronic Pain	2021	1	3
PsycInfo	Ciccone, Donald S.; Elliott, Deborah K.; Chandler, Helena K.; Nayak, Sangeetha; Raphael, Karen G.	Sexual and Physical Abuse in Women With Fibromyalgia Syndrome: A Test of the Trauma Hypothesis	2005	0
PsycInfo	Coppens, E.; Van Wambeke, P.; Morlion, B.; Weltens, N.; Giao Ly, H.; Tack, J.; Luyten, P.; Van Oudenhove, L.	Prevalence and impact of childhood adversities and post‐traumatic stress disorder in women with fibromyalgia and chronic widespread pain	2017	0
WoScience	Craner, JR; Lake, ES	Adverse Childhood Experiences and Chronic Pain Rehabilitation Treatment Outcomes in Adults	2021	1	4
PsycInfo	Daily, Shay M.; Dyer, Angela M.; Lilly, Christa L.; Sarkees, Emily A.; Bias, Thomas K.	Using adverse childhood experiences to explore the usefulness of community health needs assessments to monitor complex determinants of health at the local level	2022	1	3
PsycInfo	Daphna-Tekoah, Shir	My body protests: Childhood sexual abuse and the body	2019	1	4
WoScience	Driscoll, MA; Higgins, DM; Seng, EK; Buta, E; Goulet, JL; Heapy, AA; Kerns, RD; Brandt, CA; Haskell, SG	Trauma, Social Support, Family Conflict, and Chronic Pain in Recent Service Veterans: Does Gender Matter?	2015	1	4
WoScience	Edwards, RR; Dworkin, RH; Sullivan, MD; Turk, DC; Wasan, AD	The Role of Psychosocial Processes in the Development and Maintenance of Chronic Pain	2016	1	6
WoScience	Efrati, S; Hadanny, A; Daphna-Tekoah, S; Bechor, Y; Tiberg, K; Pik, N; Suzin, G; Lev-Wiesel, R	Recovery of Repressed Memories in Fibromyalgia Patients Treated With Hyperbaric Oxygen - Case Series Presentation and Suggested Bio-Psycho-Social Mechanism	2018	1	2
WoScience	Egle, UT; Ecker-Egle, ML; Nickel, R; van Houdenhove, B	Fibromyalgia from psychosomatic point of view	2004	1	6
WoScience	Egloff, N; Maecker, F; Stauber, S; Sabbioni, ME; Tunklova, L; von Kanel, R	Nondermatomal somatosensory deficits in chronic pain patients: Are they really hysterical?	2012	1	4
WoScience	Fitzpatrick, SS; Morgan-Lopez, AA; Saraiya, TC; Back, SE; Killeen, TK; Norman, SB; Lopez-Castro, T; Ruglass, LM; Saavedra, LM; Hien, DA	Graded Response Item Response Theory in Scaling Suicidal Thoughts and Behaviors Among Trauma-Exposed Women With Substance Use Disorders	2022	1	1
WoScience	Flehr, A; Coles, J; Dixon, JB; Gibson, SJ; Brilleman, SL; Harris, ML; Loxton, D	Epidemiology of Trauma History and Body Pain: A Retrospective Study of Community-Based Australian Women	2021	1	4
WoScience	Frayne, SM; Skinner, KM; Sullivan, LM; Tripp, TJ; Hankin, CS; Kressin, NR; Miller, DR	Medical profile of women veterans administration outpatients who report a history of sexual assault occurring while in the military	1999	1	4
WoScience	Fredland, N; Symes, L; Gilroy, H; Paulson, R; Nava, A; McFarlane, J; Pennings, J	Connecting Partner Violence to Poor Functioning for Mothers and Children: Modeling Intergenerational Outcomes	2015	0
WoScience	Gal, G; Levav, I; Gross, R	Psychopathology Among Adults Abused During Childhood or Adolescence Results From the Israel-Based World Mental Health Survey	2011	1	1
WoScience	Galvez-Sanchez, CM; Aguilar, CMI	Migraine and Neuroticism: A Scoping Review	2022	1	6
Pubmed	Gardoki-Souto, Itxaso; Redolar-Ripoll, Diego; Fontana, Marta; Hogg, Bridget; Castro, María José; Blanch, Josep M.; Ojeda, Fabiola; Solanes, Aleix; Radua, Joaquim; Valiente-Gómez, Alicia; Cirici, Roser; Pérez, Víctor; Amann, Benedikt L.; Moreno-Alcázar, Ana	Prevalence and Characterization of Psychological Trauma in Patients with Fibromyalgia: A Cross-Sectional Study	2022	0
WoScience	Garland, EL; Reese, SE; Bedford, CE; Baker, AK	Adverse childhood experiences predict autonomic indices of emotion dysregulation and negative emotional cue-elicited craving among female opioid-treated chronic pain patients	2019	0
WoScience	Georgescu, MF; Fischer, IC; Lowe, S; Pietrzak, RH	Psychological Resilience in US Military Veterans: Results from the 2019-2020 National Health and Resilience in Veterans Study	2023	1	1
Pubmed	Gerber, Megan R.; Bogdan, Kristina M.; Haskell, Sally G.; Scioli, Erica R.	Experience of Childhood Abuse and Military Sexual Trauma Among Women Veterans with Fibromyalgia	2018	1	3
WoScience	Gerhardt, A; Hartmann, M; Tesarz, J; Janke, S; Leisner, S; Seidler, G; Eich, W	Subgroups of musculoskeletal pain patients and their psychobiological patterns - The LOGIN study protocol	2012	1	6
PsycInfo	Ghitza, Udi E.	Commentary: Interaction of the ADRB2 gene polymorphism with childhood trauma in predicting adult symptoms of posttraumatic stress disorder	2015	1	6
PsycInfo	Gonzàlez, José Luis; Alonso-Fernández, Miriam; Matías-Pompa, Borja; Carretero, Isabel; Nieto-Bona, Ma Paz; López-López, Almudena	Cardiovascular responses of women with fibromyalgia to a laboratory stressor: Does post-traumatic stress disorder comorbidity matter?	2019	1	5
WoScience	Gunduz, N; Erzincan, E; Polat, A	The Relationship of Intimate Partner Violence With Psychiatric Disorders and Severity of Pain Among Female Patients With Fibromyalgia	2019	1	5
WoScience	Gunduz, N; Polat, A; Erzincan, E; Turan, H; Sade, I; Tural, U	Psychiatric comorbidity and childhood trauma in fibromyalgia syndrome	2018	1	6
WoScience	Gupta, MA	Review of somatic symptoms in post-traumatic stress disorder	2013	1	6
PsycInfo	Gürel, Dilek	Kronik ağrı tedavisinde güncel bir psikoterapotik yaklaşım: Göz hareketleri ile duyarsızlaştırma ve yeniden yapılandırma = Eye movement desensitization and reprocessing (EMDR) in treatment of chronic pain as a contemporary psychotherapeutic approach	2010	1	7
PsycInfo	Hadanny, Amir; Bechor, Yair; Catalogna, Merav; Daphna-Tekoah, Shir; Sigal, Tal; Cohenpour, Mehrzad; Lev-Wiesel, Rachel; Efrati, Shai	Hyperbaric oxygen therapy can induce neuroplasticity and significant clinical improvement in patients suffering from fibromyalgia with a history of childhood sexual abuse—randomized controlled trial	2018	1	2
WoScience	Haliburn, J	From traumatic attachment to somatization disorder	2011	1	1
WoScience	Harris, HR; Wieser, F; Vitonis, AF; Rich-Edwards, J; Boynton-Jarrett, R; Bertone-Johnson, ER; Missmer, SA	Early life abuse and risk of endometriosis	2018	1	4
Pubmed	Hart-Johnson, Tamera; Green, Carmen R.	The impact of sexual or physical abuse history on pain-related outcomes among blacks and whites with chronic pain: gender influence	2012	0
WoScience	Hauser, W; Glaesmer, H; Schmutzer, G; Brahler, E	Widespread pain in older Germans is associated with posttraumatic stress disorder and lifetime employment status - Results of a cross-sectional survey with a representative population sample	2012	0
Pubmed	Häuser, Winfried; Hoffmann, Eva-Maria; Wolfe, Frederick; Worthing, Angus B.; Stahl, Neil; Rothenberg, Russell; Walitt, Brian	Self-reported childhood maltreatment, lifelong traumatic events and mental disorders in fibromyalgia syndrome: a comparison of US and German outpatients	2015	0
PsycInfo	Heckman, Carolyn J.; Westefeld, John S.	The Relationship Between Traumatization and Pain: What is the Role of Emotion?	2006	0
WoScience	Heim, C; Bierl, C; Nisenbaum, R; Wagner, D; Reeves, WC	Regional prevalence of fatiguing illnesses in the United States before and after the terrorist attacks of September 11, 2001	2004	1	1
PsycInfo	Hellou, Raneen; Häuser, Winfried; Brenner, Inbal; Buskila, Dan; Jacob, Giris; Elkayam, Ori; Aloush, Valerie; Ablin, Jacob N.	Self-reported childhood maltreatment and traumatic events among Israeli patients suffering from fibromyalgia and rheumatoid arthritis	2017	0
WoScience	Ho, GWK; Karatzias, T; Vallieres, F; Bondjers, K; Shevlin, M; Cloitre, M; Ben-Ezra, M; Bisson, JI; Roberts, NP; Wright, LA; Hyland, P	Complex PTSD symptoms mediate the association between childhood trauma and physical health problems	2021	1	1
Pubmed	James, Kristina E.; Agarwal, Suzanne; Armenion, Karen L.; Clapp, Chris; Barnes, Arianna; Ye, Gordon Y.; Zisook, Sidney; Davidson, Judy E.	A deductive thematic analysis of nurses with job-related problems who completed suicide during the early COVID-19 pandemic: A preliminary report	2023	1	1
WoScience	John, SG; Brandt, TW; Secrist, ME; Mesman, GR; Sigel, BA; Kramer, TL	Empirically-Guided Assessment of Complex Trauma for Children in Foster Care: A Focus on Appropriate Diagnosis of Attachment Concerns	2019	1	1
Pubmed	Johnson, Benjamin N.; McKernan, Lindsey C.; Bruehl, Stephen	A Theoretical Endogenous Opioid Neurobiological Framework for Co-occurring Pain, Trauma, and Non-suicidal Self-injury	2022	1	6
Pubmed	Johnson, Benjamin Norman; McKernan, Lindsey	Co-Occurring Trauma and Non-Suicidal Self-Injury Among People With Chronic Pain: A Systematic Review	2021	1	6
PsycInfo	Karas, Hakan; Yildirim, Ejder Akgun; Kucukgoncu, Suat; Yakut, Umut	The relationship of childhood trauma, dissociative experiences and depression with pain in female patients with fibromyalgia: A cross-sectional study	2017	1	4
WoScience	Kascakova, N; Furstova, J; Hasto, J; Madarasova-Geckova, A; Tavel, P	When a Head Is about to Burst: Attachment Mediates the Relationship Between Childhood Trauma and Migraine	2020	1	4
WoScience	Kelly, A; Garland, EL	Trauma-Informed Mindfulness-Based Stress Reduction for Female Survivors of Interpersonal Violence: Results From a Stage I RCT	2016	1	1
PsycInfo	Kelly, Ursula A.; Skelton, Kelly; Patel, Meghna; Bradley, Bekh	More than military sexual trauma: Interpersonal violence, PTSD, and mental health in women veterans	2011	0
WoScience	Kendall-Tackett, K	Psychological Trauma and Physical Health: A Psychoneuroimmunology Approach to Etiology of Negative Health Effects and Possible Interventions	2009	1	1
Pubmed	Kilic, Ozge; Sar, Vedat; Taycan, Okan; Aksoy-Poyraz, Cana; Erol, Turgut C.; Tecer, Ozlem; Emul, Murat H.; Ozmen, Mine	Dissociative depression among women with fibromyalgia or rheumatoid arthritis	2014	1	3
WoScience	Kroska, EB; Roche, AI; O'Hara, MW	Childhood Trauma and Somatization: Identifying Mechanisms for Targeted Intervention	2018	1	1
WoScience	Kuhar, M; Kocjan, GZ	Adverse Childhood Experiences and Somatic Symptoms in Adulthood: A Moderated Mediation Effects of Disturbed Self-Organization and Resilient Coping	2022	1	1
WoScience	Landefeld, JC; Miaskowski, C; Tieu, L; Ponath, C; Lee, CT; Guzman, D; Kushel, M	Characteristics and Factors Associated With Pain in Older Homeless Individuals: Results From the Health Outcomes in People Experiencing Homelessness in Older Middle Age (HOPE HOME) Study	2017	0
WoScience	Lee, WJ; Choi, SH; Shin, JE; Oh, CY; Ha, NH; Lee, US; Lee, YI; Choi, Y; Lee, S; Jang, JH; Hong, YC; Kang, DH	Effects of an Online Imagery-Based Treatment Program in Patients with Workplace-Related Posttraumatic Stress Disorder: A Pilot Study	2018	1	1
Pubmed	Leisner, S.; Gerhardt, A.; Tesarz, J.; Janke, S.; Seidler, G. H.; Eich, W.	[Childhood abuse experiences and chronic low back pain. Direct and mediated effects of childhood abuse in different pain dimensions of nonspecific chronic low back pain]	2014	1	7
PsycInfo	Lerman, Imanuel; Davis, Bryan A.; Bertram, Tobias Moeller; Proudfoot, James; Hauger, Richard L.; Coe, Christopher L.; Patel, Piyush M.; Baker, Dewleen G.	Posttraumatic stress disorder influences the nociceptive and intrathecal cytokine response to a painful stimulus in combat veterans	2016	0
Pubmed	Liberzon, Israel; King, Anthony P.; Ressler, Kerry J.; Almli, Lynn M.; Zhang, Peng; Ma, Sean T.; Cohen, Gregory H.; Tamburrino, Marijo B.; Calabrese, Joseph R.; Galea, Sandro	Interaction of the ADRB2 gene polymorphism with childhood trauma in predicting adult symptoms of posttraumatic stress disorder	2014	1	1
PsycInfo	Liebschutz, Jane M.; Saitz, Richard; Weiss, Roger D.; Averbuch, Tali; Schwartz, Sonia; Meltzer, Ellen C.; Claggett-Borne, Elizabeth; Cabral, Howard; Samet, Jeffrey H.	Clinical factors associated with prescription drug use disorder in urban primary care patients with chronic pain	2010	1	5
WoScience	Lind, AB; Delmar, C; Nielsen, K	Struggling in an emotional avoidance culture: A qualitative study of stress as a predisposing factor for somatoform disorders	2014	1	1
Pubmed	Liveri, Kyriaki; Dagla, Maria; Sarantaki, Antigoni; Orovou, Eirini; Antoniou, Evangelia	Abuse of Girls During Childhood and Its Impacts on the Health of Their Adult Lives: A Systematic Review	2023	1	6
Pubmed	Lombardero, Anayansi; Hansen, Ciara D.; Richie, Andrew E.; Campbell, Duncan G.; Joyce, Aaron W.	A Narrative Review of the Literature on Insufficient Sleep, Insomnia, and Health Correlates in American Indian/Alaska Native Populations	2019	1	6
PsycInfo	López-López, A.; Matías-Pompa, B.; Fernández-Carnero, J.; Gil-Martínez, A.; Alonso-Fernández, M.; Alonso Pérez, J. L.; González Gutierrez, J. L.	Blunted pain modulation response to induced stress in women with fibromyalgia with and without posttraumatic stress disorder comorbidity: New evidence of hypo-reactivity to stress in fibromyalgia?	2021	0
WoScience	Luk, JW; Bond, AE; Gabrielli, J; LaCroix, JM; Perera, KU; Lee-Tauler, SY; Goldston, DB; Soumoff, A; Ghahramanlou-Holloway, M	A latent class analysis of physical, emotional, and sexual abuse history among suicidal inpatients	2021	1	1
PsycInfo	Maccarrone, Jodie; Stripling, Ashley; Iannucci, Julia; Nierenberg, Barry	Exposure to trauma, PTSD and persistent pain in older adults: A systematic review	2021	1	6
WoScience	Madden, VJ; Msolo, N; Mqadi, L; Lesosky, M; Bedwell, GJ; Hutchinson, MR; Peter, JG; Parker, R; Schrepf, A; Edwards, RR; Joska, JA	Study protocol: an observational study of distress, immune function and persistent pain in HIV	2022	1	6
PsycInfo	Manning, Carolyn	Treatment of trauma associated with childhood sexual assault	1996	1	6
Pubmed	Manuel, Jorge; Rudolph, Linda; Beissner, Florian; Neubert, Till-Ansgar; Dusch, Martin; Karst, Matthias	Traumatic Events, Posttraumatic Stress Disorder, and Central Sensitization in Chronic Pain Patients of a German University Outpatient Pain Clinic	2023	0
Pubmed	Marin, Teresa J.; Lewinson, Rebecca E.; Hayden, Jill A.; Mahood, Quenby; Rossi, Meghan A.; Rosenbloom, Brittany; Katz, Joel	A Systematic Review of the Prospective Relationship between Child Maltreatment and Chronic Pain	2021	1	6
PsycInfo	Mays, Iain; Flynn, Jack; McGuire, Brian; Egan, Jonathan	The role of attachment style, adverse childhood experiences and dissociation in migraine	2021	1	4
PsycInfo	McCall-Hosenfeld, Jennifer S.; Winter, Michael; Heeren, Timothy; Liebschutz, Jane M.	The association of interpersonal trauma with somatic symptom severity in a primary care population with chronic pain: Exploring the role of gender and the mental health sequelae of trauma	2014	0
PsycInfo	McFarlane, Judith; Nava, Angeles; Gilroy, Heidi; Paulson, Rene; Maddoux, John	Testing two global models to prevent violence against women and children: Methods and baseline data analysis of a seven-year prospective study	2012	1	1
Pubmed	McKernan, Lindsey C.; Johnson, Benjamin N.; Reynolds, William S.; Williams, David A.; Cheavens, Jennifer S.; Dmochowski, Roger R.; Crofford, Leslie J.	Posttraumatic stress disorder in interstitial cystitis/bladder pain syndrome: Relationship to patient phenotype and clinical practice implications	2019	0
WoScience	Meltzer-Brody, S; Leserman, J; Zolnoun, D; Steege, J; Green, E; Teich, A	Trauma and posttraumatic stress disorder in women with chronic pelvic pain	2007	0
WoScience	Merdler-Rabinowicz, R; Hassidim, A; Hellou, R; Merdler, I; Hauser, W; Ablin, JN	Self-reported childhood maltreatment, lifelong traumatic events and mental disorders in American and Israeli rheumatoid arthritis patients	2018	1	4
Pubmed	Miller, Jillian Vinall; Andre, Quinn; Timmers, Inge; Simons, Laura; Rasic, Nivez; Lebel, Catherine; Noel, Melanie	Subclinical post-traumatic stress symptomology and brain structure in youth with chronic headaches	2021	1	1
PsycInfo	Moeller‐Bertram, Tobias; Strigo, Irina A.; Simmons, Alan N.; Schilling, Jan M.; Patel, Piyush; Baker, Dewleen G.	Evidence for acute central sensitization to prolonged experimental pain in posttraumatic stress disorder	2014	1	1
WoScience	Mordeno, IG; Gallemit, IMJS; Ferolino, MAL; Sinday, JV	DSM-5-Based ASD Models: Assessing the Latent Structural Relations with Functionality in War-Exposed Individuals	2021	1	1
PsycInfo	Morris, Matthew C.; Bailey, Brooklynn; Ruiz, Ernesto	Pain in the acute aftermath of stalking: Associations with posttraumatic stress symptoms, depressive symptoms, and posttraumatic cognitions	2020	1	1
Pubmed	Moussaoui, Dehlia; Grover, Sonia Regina	The Association between Childhood Adversity and Risk of Dysmenorrhea, Pelvic Pain, and Dyspareunia in Adolescents and Young Adults: A Systematic Review	2022	1	6
WoScience	Nacak, Y; Morawa, E; Tuffner, D; Erim, Y	Insecure attachment style and cumulative traumatic life events in patients with somatoform pain disorder: A cross-sectional study	2017	1	4
PsycInfo	Nater, Urs M.; Fischer, Susanne; Ehlert, Ulrike	Stress as a pathophysiological factor in functional somatic syndromes	2011	1	6
WoScience	Nelson, S; Cunningham, N; Peugh, J; Jagpal, A; Arnold, LM; Lynch-Jordan, A; Kashikar-Zuck, S	Clinical Profiles of Young Adults With Juvenile-Onset Fibromyalgia With and Without a History of Trauma	2017	1	4
WoScience	Nelson, S; Simons, LE; Logan, D	The Incidence of Adverse Childhood Experiences (ACEs) and Their Association With Pain-related and Psychosocial Impairment in Youth With Chronic Pain	2018	1	1
PsycInfo	Nelson, Sarah; Beveridge, Jaimie K.; Mychasiuk, Richelle; Noel, Melanie	Adverse childhood experiences (aces) and internalizing mental health, pain, and quality of life in youth with chronic pain: A longitudinal examination	2021	1	1
Pubmed	Nelson, Sarah; Borsook, David; Bosquet Enlow, Michelle	Targeting the stress response in pediatric pain: current evidence for psychosocial intervention and avenues for future investigation	2021	1	1
WoScience	Nicol, AL; Sieberg, CB; Clauw, DJ; Hassett, AL; Moser, SE; Brummett, CM	The Association Between a History of Lifetime Traumatic Events and Pain Severity, Physical Function, and Affective Distress in Patients With Chronic Pain	2016	1	4
PsycInfo	Nicolson, Nancy A.; Davis, Mary C.; Kruszewski, Denise; Zautra, Alex J.	Childhood maltreatment and diurnal cortisol patterns in women with chronic pain	2010	0
WoScience	Noll-Hussong, M; Otti, A; Laeer, L; Wohlschlaeger, A; Zimmer, C; Lahmann, C; Henningsen, P; Toelle, T; Guendel, H	Aftermath of sexual abuse history on adult patients suffering from chronic functional pain syndromes: An fMRI pilot study	2010	1	4
WoScience	Ortiz, R; Ballard, ED; Machado-Vieira, R; Saligan, LN; Walitt, B	Quantifying the influence of child abuse history on the cardinal symptoms of fibromyalgia	2016	1	4
WoScience	Ozen, B; Ozdemir, YO; Bestepe, EE	Childhood trauma and dissociation among women with genito-pelvic pain/penetration disorder	2018	1	3
WoScience	Ozsoy, F; Tasci, I	Defense Mechanisms, Dissociation, Alexithymia and Childhood Traumas in Chronic Migraine Patients	2021	1	DUPLICATE
PsycInfo	Özsoy, Filiz; Taşcı, İrem	Defense mechanisms, dissociation, alexithymia and childhood traumas in chronic migraine patients	2021	1	4
PsycInfo	Panisch, Lisa S.; Rogers, Rebecca G.; Breen, Michael T.; Nutt, Stephanie; Dahud, Soraya; Salazar, Christina A.	Childhood betrayal trauma, dissociation, and shame impact health-related quality of life among individuals with chronic pelvic pain	2022	0
Pubmed	Parker, Romy; Jelsma, Jennifer; Stein, Dan J.	Pain in amaXhosa women living with HIV/AIDS: a cross-sectional study of ambulant outpatients	2017	1	1
PsycInfo	Parnell, Denise; Ram, Vasudha; Cazares, Paulette; Webb-Murphy, Jennifer; Roberson, Melanie; Ghaed, Shiva	Sexual assault and disabling PTSD in active duty service women	2018	0
WoScience	Pebole, MM; Greco, CE; Gobin, RL; Phillips, BN; Strauser, DR	Impact of childhood maltreatment on psychosomatic outcomes among men and women with disabilities	2022	1	1
WoScience	Peles, E; Seligman, Z; Bloch, M; Potik, D; Sason, A; Schreiber, S; Adelson, M	Sexual Abuse and its Relation to Chronic Pain among Women from a Methadone Maintenance Clinic versus a Sexual Abuse Treatment Center	2016	0
EBSCOhost	Peterlin, B. Lee; Tietjen, Gretchen; Meng, Sarah; Lidicker, Jeffrey; Bigal, Marcelo	Post-Traumatic Stress Disorder in Episodic and Chronic Migraine.	2008	1	3
WoScience	Pierce, J; Hassett, AL; Brummett, CM; McAfee, J; Sieberg, C; Schrepf, A; Harte, SE	Characterizing Pain and Generalized Sensory Sensitivity According to Trauma History Among Patients With Knee Osteoarthritis	2021	1	4
Pubmed	Ranjbar, Noshene; Erb, Matt	Adverse Childhood Experiences and Trauma-Informed Care in Rehabilitation Clinical Practice	2019	1	6
PsycInfo	Ranney, Rachel M.; Maguen, Shira; Bernhard, Paul A.; Holder, Nicholas; Vogt, Dawne; Blosnich, John R.; Schneiderman, Aaron I.	Moral injury and chronic pain in veterans	2022	0
WoScience	Raphael, KG; Widom, CS	Post-traumatic stress disorder moderates the relation between documented childhood victimization and pain 30 years later	2011	1	1
WoScience	Saadi, A; Chibnik, L; Valera, E	Examining the Association Between Childhood Trauma, Brain Injury, and Neurobehavioral Symptoms Among Survivors of Intimate Partner Violence: A Cross-Sectional Analysis	2022	1	1
WoScience	Sachs-Ericsson, N; Blazer, D; Plant, EA; Arnow, B	Childhood sexual and physical abuse and the 1-year prevalence of medical problems in the national comorbidity survey	2005	1	1
WoScience	Sachs-Ericsson, N; Kendall-Tackett, K; Hernandez, A	Childhood abuse, chronic pain, and depression in the National Comorbidity Survey	2007	1	4
Pubmed	Sachs-Ericsson, Natalie J.; Sheffler, Julia L.; Stanley, Ian H.; Piazza, Jennifer R.; Preacher, Kristopher J.	When Emotional Pain Becomes Physical: Adverse Childhood Experiences, Pain, and the Role of Mood and Anxiety Disorders	2017	0
WoScience	Salmon, P; Skaife, K; Rhodes, J	Abuse, dissociation, and somatization in irritable bowel syndrome: Towards an explanatory model	2003	1	1
WoScience	Sansone, RA; Gaither, GA; Sansone, LA	Childhood trauma and adult somatic preoccupation by body area among women in an internal medicine setting: a pilot study	2001	1	1
Pubmed	Sansone, Randy A.; Pole, Michele; Dakroub, Hassan; Butler, Melissa	Childhood trauma, borderline personality symptomatology, and psychophysiological and pain disorders in adulthood	2006	1	4
PsycInfo	Sansone, Randy A.; Sinclair, J. David; Wiederman, Michael W.	Drug allergies and childhood trauma among chronic pain patients	2009	1	4
PsycInfo	Santo Jr, Thomas Jr.; Campbell, Gabrielle; Gisev, Natasa; Degenhardt, Louisa	Exposure to childhood trauma increases risk of opioid use disorder among people prescribed opioids for chronic non-cancer pain	2022	1	6
WoScience	Saper, Z; Brasfield, CR	Two-phase treatment of Panic Disorder and Posttraumatic Stress Disorder with associated personality features resulting from childhood abuse: Case study	1998	1	1
WoScience	Scioli-Salter, ER; Johnides, BD; Mitchell, KS; Smith, BN; Resick, PA; Rasmusson, AM	Depression and Dissociation as Predictors of Physical Health Symptoms Among Female Rape Survivors With Posttraumatic Stress Disorder	2016	1	1
WoScience	Semiz, M; Kavakci, O; Peksen, H; Tuncay, MS; Ozer, Z; Semiz, EA; Kaptanoglu, E	Post-Traumatic Stress Disorder, Alexithymia and Somatoform Dissociation in Patients with Fibromyalgia	2014	0
WoScience	Sledjeski, EM; Speisman, B; Dierker, LC	Does number of lifetime traumas explain the relationship between PTSD and chronic medical conditions? Answers from the National Comorbidity Survey-Replication (NCS-R)	2008	0
WoScience	Smith, BN; Shipherd, JC; Schuster, JL; Vogt, DS; King, LA; King, DW	Posttraumatic Stress Symptomatology as a Mediator of the Association Between Military Sexual Trauma and Post-Deployment Physical Health in Women	2011	1	1
PsycInfo	Smith, Kirsten E.; Bunting, Amanda M.; Golder, Seana; Hall, Martin T.; Higgins, George E.; Logan, T. K.	Prevalence and correlates of disability among a sample of victimized women on probation and parole	2019	0
EBSCOhost	Spadoni, Andrea D.; Vinograd, Meghan; Cuccurazzu, Bruna; Torres, Katy; Glynn, Laura M.; Davis, Elysia P.; Baram, Tallie Z.; Baker, Dewleen G.; Nievergelt, Caroline M.; Risbrough, Victoria B.	Contribution of early‐life unpredictability to neuropsychiatric symptom patterns in adulthood.	2022	0
PsycInfo	Spinhoven, Philip; Roelofs, Karin; Moene, Franny; Kuyk, Jarl; Nijenhuis, Ellert; Hoogduin, Kees; Van Dyck, Richard	Trauma and dissociation in conversion disorder and chronic pelvic pain	2004	1	4
WoScience	Sprang, G; Bush, HM; Coker, AL; Brancato, CJ	Types of Trauma and Self-Reported Pain That Limits Functioning in Different-Aged Cohorts	2020	1	4
WoScience	Springer, KW; Sheridan, J; Kuo, D; Carnes, M	The long-term health outcomes of childhood abuse - An overview and a call to action	2003	1	6
PsycInfo	Strigo, Irina A.; Simmons, Alan N.; Matthews, Scott C.; Grimes, Erin M.; Allard, Carolyn B.; Reinhardt, Lindsay E.; Paulus, Martin P.; Stein, Murray B.	Neural correlates of altered pain response in women with posttraumatic stress disorder from intimate partner violence	2010	1	1
PsycInfo	Strigo, Irina A.; Spadoni, Andrea D.; Inslicht, Sabra S.; Simmons, Alan N.	Repeated exposure to experimental pain differentiates combat traumatic brain injury with and without post-traumatic stress disorder	2018	1	1
WoScience	Symes, L; Maddoux, J; McFarlane, J; Nava, A; Gilroy, H	Physical and sexual intimate partner violence, women's health and children's behavioural functioning: entry analysis of a seven-year prospective study	2014	0
WoScience	Tesarz, J; Eich, WG; Treede, RD; Gerhardt, A	Altered pressure pain thresholds and increased wind-up in adult patients with chronic back pain with a history of childhood maltreatment: a quantitative sensory testing study	2016	1	4
WoScience	Tsur, N; Stein, JY; Levin, Y; Siegel, A; Solomon, Z	Loneliness and subjective physical health among war veterans: Long term reciprocal effects	2019	1	1
PsycInfo	Tsur, Noga	Chronic pain personification following child abuse: The imprinted experience of child abuse in later chronic pain	2022	0
PsycInfo	Tsur, Noga	Pain flashbacks: Exploration of intrusive pain symptoms following child abuse	2023	0
WoScience	Tu, PV; Ngoc, TU; Nguyen, PL; Thuong, NH; Tuan, NV; Hung, NV; Nga, VT; Quan, TV; Lam, LT; Chu, DT	The impact of sexual harassment on obesity in female adolescents: An update and perspective to control	2020	1	1
PsycInfo	Van Houdenhove, Boudewijn; Luyten, Patrick; Tiber Egle, Ulrich	Stress as a key concept in chronic widespread pain and fatigue disorders	2009	1	6
WoScience	vanderKolk, BA; Pelcovitz, D; Roth, S; Mandel, FS; McFarlane, A; Herman, JL	Dissociation, somatization, and affect dysregulation: The complexity of adaptation to trauma	1996	1	1
PsycInfo	Varcoe, Colleen; Ford-Gilboe, Marilyn; Browne, Annette J.; Perrin, Nancy; Bungay, Vicky; McKenzie, Holly; Smye, Victoria; Price (Elder), Roberta; Inyallie, Jane; Khan, Koushambhi; Dion Stout, Madeleine	The efficacy of a health promotion intervention for indigenous women: Reclaiming our spirits	2021	1	5
Pubmed	Vogel, Matthias; Krippl, Martin; Frenzel, Lydia; Riediger, Christian; Frommer, Jörg; Lohmann, Christoph; Illiger, Sebastian	Dissociation and Pain-Catastrophizing: Absorptive Detachment as a Higher-Order Factor in Control of Pain-Related Fearful Anticipations Prior to Total Knee Arthroplasty (TKA)	2019	1	4
PsycInfo	Walker, Edward A.; Katon, Wayne J.; Keegan, David; Gardner, Gregory; Sullivan, Mark	Predictors of physician frustration in the care of patients with rheumatological complaints	1997	1	1
Pubmed	Weissbecker, Inka; Floyd, Andrea; Dedert, Eric; Salmon, Paul; Sephton, Sandra	Childhood trauma and diurnal cortisol disruption in fibromyalgia syndrome	2006	1	4
WoScience	Westermair, AL; Stoll, AM; Greggersen, W; Kahl, KG; Huppe, M; Schweiger, U	All Unhappy Childhoods Are Unhappy in Their Own Way - Differential Impact of Dimensions of Adverse Childhood Experiences on Adult Mental Health and Health Behavior	2018	1	1
WoScience	Wijma, K; Soderquist, J; Bjorklund, I; Wijma, B	Prevalence of post-traumatic stress disorder among gynecological patients with a history of sexual and physical abuse	2000	1	1
WoScience	Williams, AB; Smith, ER; Trujillo, MA; Perrin, PB; Griffin, S; Rybarczyk, B	Common health problems in safety-net primary care: Modeling the roles of trauma history and mental health	2019	1	1
Pubmed	Williams, Jessica Roberts; Cole, Veronica; Girdler, Susan; Cromeens, Martha Grace	Exploring stress, cognitive, and affective mechanisms of the relationship between interpersonal trauma and opioid misuse	2020	1	1
PsycInfo	Wuest, Judith; Ford-Gilboe, Marilyn; Merritt-Gray, Marilyn; Varcoe, Colleen; Lent, Barbara; Wilk, Piotr; Campbell, Jacquelyn	Abuse-related injury and symptoms of posttraumatic stress disorder as mechanisms of chronic pain in survivors of intimate partner violence	2009	0
EBSCOhost	Wuest, Judith; Ford-Gilboe, Marilyn; Merritt-Gray, Marilyn; Wilk, Piotr; Campbell, Jacquelyn C.; Lent, Barbara; Varcoe, Colleen; Smye, Victoria	Pathways of Chronic Pain in Survivors of Intimate Partner Violence.	2010	0
Pubmed	Yehuda, Rachel; Seckl, Jonathan	Minireview: Stress-related psychiatric disorders with low cortisol levels: a metabolic hypothesis	2011	1	6
Pubmed	Yücel, Basak; Ozyalcin, Süleyman; Sertel, H. Ozlem; Camlica, Hakan; Ketenci, Aysegül; Talu, Gül K.	Childhood traumatic events and dissociative experiences in patients with chronic headache and low back pain	2002	1	4
WoScience	Ziadni, MS; You, DS; Sturgeon, JA; Mackey, SC; Darnall, BD	Perceived Injustice Mediates the Relationship Between Perceived Childhood Neglect and Current Function in Patients with Chronic Pain: A Preliminary Pilot Study	2021	1	3
WoScience	Zvolensky, MJ; Rogers, AH; Shepherd, JM; Vujanovic, AA; Bakhshaie, J	Anxiety sensitivity and opioid misuse and dependence among trauma-exposed adults with chronic pain	2020	0

## Sheet: Full text
Library	AUTHOR	TITLE	YEAR	Inclusion (0)/ Exclusion (1)	Reason for exclusion
PsycInfo	Alciati, Alessandra; Cirillo, Mariateresa; Masala, Ignazio Francesco; Sarzi‐Puttini, Piercarlo; Atzeni, Fabiola	Differences in depression, anxiety and stress disorders between fibromyalgia associated with rheumatoid arthritis and primary fibromyalgia	2021	0
PsycInfo	Ciccone, Donald S.; Elliott, Deborah K.; Chandler, Helena K.; Nayak, Sangeetha; Raphael, Karen G.	Sexual and Physical Abuse in Women With Fibromyalgia Syndrome: A Test of the Trauma Hypothesis	2005	0
PsycInfo	Coppens, E.; Van Wambeke, P.; Morlion, B.; Weltens, N.; Giao Ly, H.; Tack, J.; Luyten, P.; Van Oudenhove, L.	Prevalence and impact of childhood adversities and post‐traumatic stress disorder in women with fibromyalgia and chronic widespread pain	2017	0
WoScience	Fredland, N; Symes, L; Gilroy, H; Paulson, R; Nava, A; McFarlane, J; Pennings, J	Connecting Partner Violence to Poor Functioning for Mothers and Children: Modeling Intergenerational Outcomes	2015	1	1
Pubmed	Gardoki-Souto, Itxaso; Redolar-Ripoll, Diego; Fontana, Marta; Hogg, Bridget; Castro, María José; Blanch, Josep M.; Ojeda, Fabiola; Solanes, Aleix; Radua, Joaquim; Valiente-Gómez, Alicia; Cirici, Roser; Pérez, Víctor; Amann, Benedikt L.; Moreno-Alcázar, Ana	Prevalence and Characterization of Psychological Trauma in Patients with Fibromyalgia: A Cross-Sectional Study	2022	0
WoScience	Garland, EL; Reese, SE; Bedford, CE; Baker, AK	Adverse childhood experiences predict autonomic indices of emotion dysregulation and negative emotional cue-elicited craving among female opioid-treated chronic pain patients	2019	1	4
Pubmed	Hart-Johnson, Tamera; Green, Carmen R.	The impact of sexual or physical abuse history on pain-related outcomes among blacks and whites with chronic pain: gender influence	2012	0
WoScience	Hauser, W; Glaesmer, H; Schmutzer, G; Brahler, E	Widespread pain in older Germans is associated with posttraumatic stress disorder and lifetime employment status – Results of a cross-sectional survey with a representative population sample	2012	1	1
Pubmed	Häuser, Winfried; Hoffmann, Eva-Maria; Wolfe, Frederick; Worthing, Angus B.; Stahl, Neil; Rothenberg, Russell; Walitt, Brian	Self-reported childhood maltreatment, lifelong traumatic events and mental disorders in fibromyalgia syndrome: a comparison of US and German outpatients	2015	0
PsycInfo	Heckman, Carolyn J.; Westefeld, John S.	The Relationship Between Traumatization and Pain: What is the Role of Emotion?	2006	1	1
PsycInfo	Hellou, Raneen; Häuser, Winfried; Brenner, Inbal; Buskila, Dan; Jacob, Giris; Elkayam, Ori; Aloush, Valerie; Ablin, Jacob N.	Self-reported childhood maltreatment and traumatic events among Israeli patients suffering from fibromyalgia and rheumatoid arthritis	2017	0
PsycInfo	Kelly, Ursula A.; Skelton, Kelly; Patel, Meghna; Bradley, Bekh	More than military sexual trauma: Interpersonal violence, PTSD, and mental health in women veterans	2011	1	1
WoScience	Landefeld, JC; Miaskowski, C; Tieu, L; Ponath, C; Lee, CT; Guzman, D; Kushel, M	Characteristics and Factors Associated With Pain in Older Homeless Individuals: Results From the Health Outcomes in People Experiencing Homelessness in Older Middle Age (HOPE HOME) Study	2017	1	5
PsycInfo	Lerman, Imanuel; Davis, Bryan A.; Bertram, Tobias Moeller; Proudfoot, James; Hauger, Richard L.; Coe, Christopher L.; Patel, Piyush M.; Baker, Dewleen G.	Posttraumatic stress disorder influences the nociceptive and intrathecal cytokine response to a painful stimulus in combat veterans	2016	1	1
PsycInfo	López-López, A.; Matías-Pompa, B.; Fernández-Carnero, J.; Gil-Martínez, A.; Alonso-Fernández, M.; Alonso Pérez, J. L.; González Gutierrez, J. L.	Blunted Pain Modulation Response to Induced Stress in Women with Fibromyalgia with and without Posttraumatic Stress Disorder Comorbidity: New Evidence of Hypo-Reactivity to Stress in Fibromyalgia?	2020	0
Pubmed	Manuel, Jorge; Rudolph, Linda; Beissner, Florian; Neubert, Till-Ansgar; Dusch, Martin; Karst, Matthias	Traumatic Events, Posttraumatic Stress Disorder, and Central Sensitization in Chronic Pain Patients of a German University Outpatient Pain Clinic	2023	1	5
PsycInfo	McCall-Hosenfeld, Jennifer S.; Winter, Michael; Heeren, Timothy; Liebschutz, Jane M.	The association of interpersonal trauma with somatic symptom severity in a primary care population with chronic pain: Exploring the role of gender and the mental health sequelae of trauma	2014	1	3
Pubmed	McKernan, Lindsey C.; Johnson, Benjamin N.; Reynolds, William S.; Williams, David A.; Cheavens, Jennifer S.; Dmochowski, Roger R.; Crofford, Leslie J.	Posttraumatic stress disorder in interstitial cystitis/bladder pain syndrome: Relationship to patient phenotype and clinical practice implications	2019	0
WoScience	Meltzer-Brody, S; Leserman, J; Zolnoun, D; Steege, J; Green, E; Teich, A	Trauma and posttraumatic stress disorder in women with chronic pelvic pain	2007	1	5
PsycInfo	Nicolson, Nancy A.; Davis, Mary C.; Kruszewski, Denise; Zautra, Alex J.	Childhood maltreatment and diurnal cortisol patterns in women with chronic pain	2010	0
PsycInfo	Panisch, Lisa S.; Rogers, Rebecca G.; Breen, Michael T.; Nutt, Stephanie; Dahud, Soraya; Salazar, Christina A.	Childhood betrayal trauma, dissociation, and shame impact health-related quality of life among individuals with chronic pelvic pain	2022	1	3
PsycInfo	Parnell, Denise; Ram, Vasudha; Cazares, Paulette; Webb-Murphy, Jennifer; Roberson, Melanie; Ghaed, Shiva	Sexual assault and disabling PTSD in active duty service women	2018	1	1
WoScience	Peles, E; Seligman, Z; Bloch, M; Potik, D; Sason, A; Schreiber, S; Adelson, M	Sexual Abuse and its Relation to Chronic Pain among Women from a Methadone Maintenance Clinic versus a Sexual Abuse Treatment Center	2016	0
PsycInfo	Ranney, Rachel M.; Maguen, Shira; Bernhard, Paul A.; Holder, Nicholas; Vogt, Dawne; Blosnich, John R.; Schneiderman, Aaron I.	Moral injury and chronic pain in veterans	2022	1	1
Pubmed	Sachs-Ericsson, Natalie J.; Sheffler, Julia L.; Stanley, Ian H.; Piazza, Jennifer R.; Preacher, Kristopher J.	When Emotional Pain Becomes Physical: Adverse Childhood Experiences, Pain, and the Role of Mood and Anxiety Disorders	2017	1	1
WoScience	Semiz, M; Kavakci, O; Peksen, H; Tuncay, MS; Ozer, Z; Semiz, EA; Kaptanoglu, E	Post-Traumatic Stress Disorder, Alexithymia and Somatoform Dissociation in Patients with Fibromyalgia	2014	0
WoScience	Sledjeski, EM; Speisman, B; Dierker, LC	Does number of lifetime traumas explain the relationship between PTSD and chronic medical conditions? Answers from the National Comorbidity Survey-Replication (NCS-R)	2008	1	5
PsycInfo	Smith, Kirsten E.; Bunting, Amanda M.; Golder, Seana; Hall, Martin T.; Higgins, George E.; Logan, T. K.	Prevalence and correlates of disability among a sample of victimized women on probation and parole	2019	1	1
EBSCOhost	Spadoni, Andrea D.; Vinograd, Meghan; Cuccurazzu, Bruna; Torres, Katy; Glynn, Laura M.; Davis, Elysia P.; Baram, Tallie Z.; Baker, Dewleen G.; Nievergelt, Caroline M.; Risbrough, Victoria B.	Contribution of early‐life unpredictability to neuropsychiatric symptom patterns in adulthood.	2022	1	1
WoScience	Symes, L; Maddoux, J; McFarlane, J; Nava, A; Gilroy, H	Physical and sexual intimate partner violence, women's health and children's behavioural functioning: entry analysis of a seven-year prospective study	2014	1	1
PsycInfo	Tsur, Noga	Chronic pain personification following child abuse: The imprinted experience of child abuse in later chronic pain	2022	1	1
PsycInfo	Tsur, Noga	Pain flashbacks: Exploration of intrusive pain symptoms following child abuse	2023	0
PsycInfo	Wuest, Judith; Ford-Gilboe, Marilyn; Merritt-Gray, Marilyn; Varcoe, Colleen; Lent, Barbara; Wilk, Piotr; Campbell, Jacquelyn	Abuse-related injury and symptoms of posttraumatic stress disorder as mechanisms of chronic pain in survivors of intimate partner violence	2009	1	1
EBSCOhost	Wuest, Judith; Ford-Gilboe, Marilyn; Merritt-Gray, Marilyn; Wilk, Piotr; Campbell, Jacquelyn C.; Lent, Barbara; Varcoe, Colleen; Smye, Victoria	Pathways of Chronic Pain in Survivors of Intimate Partner Violence.	2010	1	1
WoScience	Zvolensky, MJ; Rogers, AH; Shepherd, JM; Vujanovic, AA; Bakhshaie, J	Anxiety sensitivity and opioid misuse and dependence among trauma-exposed adults with chronic pain	2020	1	5
